# Supplementary material for: CD97 promotion of gastric carcinoma lymphatic metastasis is exosome dependent
Source: PubMed Central journal article supplement (PMC4906076; doi:10.1007/s10120-015-0523-y), 2015-08-02
Supplement: 10120_2015_523_MOESM1_ESM.pdf [file 10120_2015_523_MOESM1_ESM.pdf]

**Supplementary Table S1** miRNA candidate and negative control sequences for CD97.

| <b>oligo</b>      | <b>Sequence (5' -3' )</b>                                         |
|-------------------|-------------------------------------------------------------------|
| <b>1F</b>         | TGCTGATGACATTCTGGATGGTGACCGTTTTGGCCACTGACTGACGGTCACCACAGAATGTCAT  |
| <b>1R</b>         | CCTGATGACATTCTGTGGTGACCGTCAGTCAGTGGCCAAAACGGTCACCATCCAGAATGTCATC  |
| <b>2F</b>         | TGCTGTATCTTCAAGGTTTGAGAGCAGTTTTGGCCACTGACTGACTGCTCTCACCTTGAAGATA  |
| <b>2R</b>         | CCTGTATCTTCAAGGTGAGAGCAGTCAGTCAGTGGCCAAAACCTGCTCTCAAACCTTGAAGATAC |
| <b>3F</b>         | TGCTGAAGAAAGTAGAGCTCCAGGCCGTTTTGGCCACTGACTGACGGCCTGGATCTACTTTCTT  |
| <b>3R</b>         | CCTGAAGAAAGTAGATCCAGGCCGTCAGTCAGTGGCCAAAACGGCCTGGAGCTCTACTTTCTTC  |
| <b>4F</b>         | TGCTGAAGATGAACAGGCCAAAGACCGTTTTGGCCACTGACTGACGGTCTTTGCTGTTTCATCTT |
| <b>4R</b>         | CCTGAAGATGAACAGCAAAGACCGTCAGTCAGTGGCCAAAACGGTCTTTGGCCTGTTTCATCTTC |
| <b>Negative-F</b> | TGCTGAAATGTACTGCGCGTGGAGACGTTTTGGCCACTGACTGACGTCTCCACGCAGTACATTT  |
| <b>Negative-R</b> | CCTGAAATGTACTGCGTGGAGACGTCAGTCAGTGGCCAAAACGTCTCCACGCGCAGTACATTTTC |

## Supplementary Table S2 Primer sequences

| Primer name    |           | Sequence (5' - 3')      |
|----------------|-----------|-------------------------|
| CD97           | Sense     | actctgccgggagctgaaac    |
|                | Antisense | tggatggtgacctggctga     |
| CD55           | Sense     | ttcaagggtcccaccaacag    |
|                | Antisense | accatcaacacccctggttc    |
| CD44v6         | Sense     | ggcaacagatggcatgaggg    |
|                | Antisense | agtggatgggacccccactgggg |
| EGFR           | Sense     | ggcctaagatcccgctcatc    |
|                | Antisense | tgctttcggagatgtgtc      |
| HER2           | Sense     | cacccaagccaacaaagaa     |
|                | Antisense | cacatcctccaggtagctcatc  |
| $\beta$ -actin | Sense     | aggctggtcctcctatcgtt    |
|                | Antisense | tctgggtaagagcccaggtt    |
